# Supplementary material for: Unveiling the electrophilic aromatic substitution reactions of pyridine derivatives with nitronium ion through molecular electron density theory
Source: Royal Society of Chemistry journal article supplement (doi:10.1039/d2nj05845f), 2023-01-01
Supplement: d2nj05845f1.pdf [file d2nj05845f1.pdf]

## Electronic Supplementary Information

### Unveiling the Electrophilic Aromatic Substitution Reactions of Pyridine Derivatives with Nitronium Ion through Molecular Electron Density Theory

Luis R. Domingo,\* and María José Aurell

Department of Organic Chemistry, University of Valencia,  
Dr. Moliner 50, 46100 Burjassot, Valencia, Spain

Email: [luisrdomingo@gmail.com](mailto:luisrdomingo@gmail.com)

#### Index

- S2** Table with the  $\omega$ B97X-D/6-311G(d,p) enthalpies, entropies, and Gibbs free energies of the stationary points involved in in the EAS nitration reaction of pyridine **3** with nitronium  $\text{NO}_2^+$  ion **13**.
- S2** Table with the  $\omega$ B97X-D/6-311G(d,p) enthalpies, entropies, and Gibbs free energies of the stationary points involved in in the EAS nitration reaction of protonated pyridine **4** with nitronium  $\text{NO}_2^+$  ion **13**.
- S3** Table with the  $\omega$ B97X-D/6-311G(d,p) enthalpies, entropies, and Gibbs free energies of the stationary points involved in in the EAS nitration reaction of protonate pyridine-N-oxide **14** with nitronium  $\text{NO}_2^+$  ion **13**.
- S3** Table with the  $\omega$ B97X-D/6-311G(d,p) enthalpies, entropies, and Gibbs free energies of the stationary points involved in in the EAS nitration reaction of pyridine-N-oxide **7** with nitronium  $\text{NO}_2^+$  ion **13**.
- S4** Table with the  $\omega$ B97X-D/6-311G(d,p) electronic energies, enthalpies, entropies, and Gibbs free energies of **TS-IV-o-solv** and **TS-IV-p-solv**.
- S5** Table with the populations of the more relevant ELF valence basin of **TS-I-m** and **TS-IV-o**.

**Table S1.**  $\omega$ B97X-D/6-311G(d,p) enthalpies, H in a.u., entropies, S in kcal·mol<sup>-1</sup>K<sup>-1</sup>, and Gibbs free energies, G in a.u., computed in water at r.t., of the stationary points involved in in the EAS nitration reaction of pyridine **3** with nitronium NO<sub>2</sub><sup>+</sup> ion **13**.

|                                        | H           | S    | G           |
|----------------------------------------|-------------|------|-------------|
| Py <b>3</b>                            | -248.163114 | 68.5 | -248.195676 |
| NO <sub>2</sub> <sup>+</sup> <b>13</b> | -204.804600 | 51.0 | -204.828826 |
| HSO <sub>4</sub> <sup>-</sup>          | -699.763184 | 69.0 | -699.795952 |
| H <sub>2</sub> SO <sub>4</sub>         | -700.184899 | 72.1 | -700.219138 |
| <b>CM-I-m</b>                          | -452.968308 | 95.2 | -453.013563 |
| <b>TS-I-o</b>                          | -452.960214 | 84.2 | -453.000227 |
| <b>TS-I-m</b>                          | -452.964222 | 85.1 | -453.004647 |
| <b>TS-I-p</b>                          | -452.943732 | 85.2 | -452.984198 |
| <b>IN-I-o</b>                          | -452.968236 | 85.3 | -453.008752 |
| <b>IN-I-m</b>                          | -452.977331 | 85.9 | -453.018127 |
| <b>IN-I-p</b>                          | -452.956511 | 85.3 | -452.997018 |
| <b>P-I-o</b>                           | -452.650537 | 84.2 | -452.690535 |
| <b>P-I-m</b>                           | -452.647477 | 83.6 | -452.687210 |
| <b>P-I-p</b>                           | -452.646227 | 83.8 | -452.686061 |

**Table S2.**  $\omega$ B97X-D/6-311G(d,p) enthalpies, H in a.u., entropies, S in kcal·mol<sup>-1</sup>K<sup>-1</sup>, and Gibbs free energies, G in a.u., computed in water at r.t., of the stationary points involved in in the EAS nitration reaction of protonated pyridine **4** with nitronium NO<sub>2</sub><sup>+</sup> ion **13**.

|                           | H           | S    | G           |
|---------------------------|-------------|------|-------------|
| PyO <sup>+</sup> <b>4</b> | -248.601074 | 68.9 | -248.633805 |
| <b>CM-II-m</b>            | -453.406106 | 89.4 | -453.448570 |
| <b>TS-II-o</b>            | -453.346596 | 83.9 | -453.386465 |
| <b>TS-II-m</b>            | -453.354062 | 85.2 | -453.394539 |
| <b>TS-II-p</b>            | -453.333847 | 83.8 | -453.373674 |
| <b>IN-II-o</b>            | -453.345816 | 85.2 | -453.386309 |
| <b>IN-II-m</b>            | -453.356982 | 84.3 | -453.397045 |
| <b>IN-II-p</b>            | -453.335019 | 85.6 | -453.375669 |
| <b>P-II-o</b>             | -453.065618 | 83.4 | -453.105253 |
| <b>P-II-m</b>             | -453.040738 | 77.1 | -453.077362 |
| <b>P-II-p</b>             | -453.335019 | 85.6 | -453.375669 |

**Table S3.**  $\omega$ B97X-D/6-311G(d,p) enthalpies, H in a.u., entropies, S in kcal·mol<sup>-1</sup>K<sup>-1</sup>, and Gibbs free energies, G in a.u., computed in water at r.t., of the stationary points involved in the EAS nitration reaction of protonate pyridine-N-oxide **14** with nitronium NO<sub>2</sub><sup>+</sup> ion **13**.

|                 | H           | S     | G           |
|-----------------|-------------|-------|-------------|
| PyOH <b>14</b>  | -323.751703 | 75.0  | -323.787361 |
| <b>CM-III-m</b> | -528.555211 | 103.3 | -528.604270 |
| <b>TS-III-o</b> | -528.495853 | 89.9  | -528.538574 |
| <b>TS-III-m</b> | -528.500631 | 90.5  | -528.543624 |
| <b>TS-III-p</b> | -528.491427 | 90.4  | -528.534375 |
| <b>IN-III-o</b> | -528.496479 | 90.4  | -528.539422 |
| <b>IN-III-m</b> | -528.502604 | 89.9  | -528.545325 |
| <b>IN-III-p</b> | -528.492919 | 89.3  | -528.535348 |
| <b>P-III-o</b>  | -528.208575 | 88.0  | -528.250376 |
| <b>P-III-m</b>  | -528.219941 | 91.2  | -528.263259 |
| <b>P-III-p</b>  | -528.220534 | 90.3  | -528.263428 |

**Table S4.**  $\omega$ B97X-D/6-311G(d,p) enthalpies, H in a.u., entropies, S in kcal·mol<sup>-1</sup>K<sup>-1</sup>, and Gibbs free energies, G in a.u., computed in water at r.t., of the stationary points involved in the EAS nitration reaction of pyridine-N-oxide **7** with nitronium NO<sub>2</sub><sup>+</sup> ion **13**.

|                   | H           | S     | G           |
|-------------------|-------------|-------|-------------|
| PyO <b>7</b>      | -323.322211 | 72.8  | -323.356814 |
| <b>CM-IV-p</b>    | -528.126762 | 101.2 | -528.174835 |
| <b>TS-IV-o</b>    | -528.128902 | 92.9  | -528.173041 |
| <b>TS-IV-m</b>    | -528.111122 | 88.7  | -528.153433 |
| <b>TS-IV-p</b>    | -528.125674 | 93.3  | -528.169991 |
| <b>TS-IV-ipso</b> | -528.130458 | 92.4  | -528.174337 |
| <b>IN-IV-o</b>    | -528.142192 | 85.7  | -528.182906 |
| <b>IN-IV-m</b>    | -528.116892 | 89.6  | -528.159476 |
| <b>IN-IV-p</b>    | -528.150949 | 86.0  | -528.191831 |
| <b>P-IV-ipso</b>  | -528.130280 | 93.0  | -528.174470 |
| <b>P-IV-o</b>     | -527.790390 | 87.9  | -527.832150 |
| <b>P-IV-m</b>     | -527.801309 | 87.9  | -527.843080 |
| <b>P-IV-p</b>     | -527.805821 | 87.1  | -527.847227 |

**Table S5.**  $\omega$ B97X-D/6-311G(d,p) electronic energies, E in a.u., enthalpies, H in a.u., entropies, S in kcal·mol<sup>-1</sup>K<sup>-1</sup>, and Gibbs free energies, G in a.u., computed in water at r.t., of **TS-IV-o-solv** and **TS-IV-p-solv**.

|                     | E            | H            | S     | G            |
|---------------------|--------------|--------------|-------|--------------|
| <b>TS-IV-o-solv</b> | -2627.681916 | -2627.464078 | 176.7 | -2627.548011 |
| <b>TS-IV-p-solv</b> | -2627.681704 | -2627.461859 | 188.6 | -2627.551480 |

**Table S6.** Populations, in average number of electrons  $e$ , of the more relevant ELF valence basin of **TS-I-m** and **TS-IV-o**.

| <b>TS-I-m</b> |      | <b>TS-IV-o</b> |      |
|---------------|------|----------------|------|
| V(N1)         | 2.72 | V(N1,C2)       | 2.73 |
| V(N1,C2)      | 2.30 | V(C2,C3)       | 2.97 |
| V(C2,C3)      | 2.58 | V(C3,C4)       | 2.79 |
| V(C3,C4)      | 2.47 | V(C4,C5)       | 2.61 |
| V(C4,C5)      | 2.55 | V(C5,C6)       | 3.06 |
| 18 V(C5,C6)   | 2.47 | V(N1,6)        | 2.75 |
| V(N1,C6)      | 2.86 | V(N1,O7)       | 1.45 |
|               |      | V(O7)          | 2.95 |
|               |      | V(O7)          | 2.92 |
| V(N7)         | 1.77 | V(N8)          | 1.14 |
| V(N7,O9)      | 2.00 | V(N8,O9)       | 2.39 |
| V(N7,O8)      | 2.01 | V(N8,O10)      | 2.33 |
| V(O8)         | 2.87 | V(O9)          | 3.62 |
| V'(O8)        | 2.42 | V'(O9)         | 1.36 |
| V(O9)         | 2.88 | V(O10)         | 2.13 |
| V'(O9)        | 2.39 | V'(O10)        | 2.95 |
